# Supplementary material
Source: Springer Nature journal article supplement (https://www.springermedizin.de/resource/supplementary/12882_2013_649_MOESM4_ESM.pdf/9454028)

**A**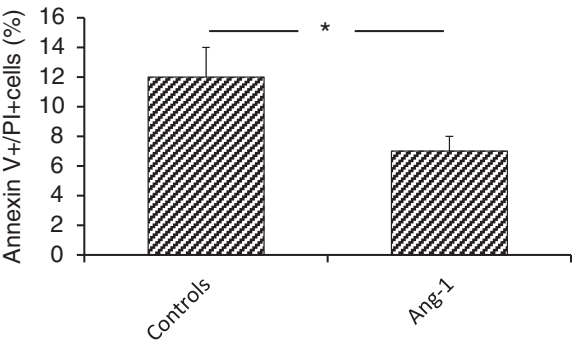**B**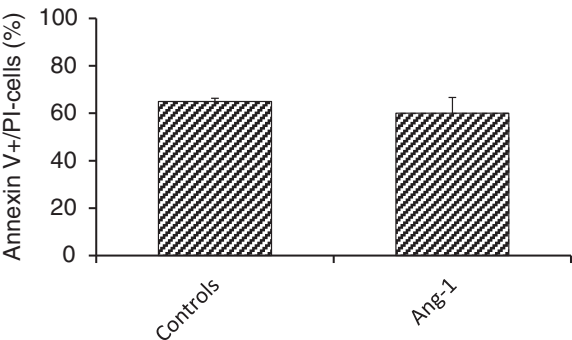

Supplement: MOESM4 [file 9454028]
